# Supplementary material for: Simple and Fast Assay for Apolipoprotein E Phenotyping and Glycotyping: Discovering Isoform-Specific Glycosylation in Plasma and Cerebrospinal Fluid
Source: PubMed Central journal article supplement — J Alzheimers Dis. 2020 Aug 4;76(3):883–93. doi: 10.3233/JAD-200203 (PMC7504994; doi:10.3233/jad-200203), 2020-08-04

# Supplementary Material

## Simple and Fast Assay for Apolipoprotein E Phenotyping and Glycotyping: Discovering Isoform-Specific Glycosylation in Plasma and Cerebrospinal Fluid

**Supplementary Table 1.** Characteristics of the study population.

| Variables                                           | N=22        |
|-----------------------------------------------------|-------------|
| <b>ApoE, N (%)</b>                                  |             |
| $\epsilon 2/\epsilon 3$                             | 5 (22.7%)   |
| $\epsilon 2/\epsilon 4$                             | 2 (9%)      |
| $\epsilon 3/\epsilon 3$                             | 5 (22.7%)   |
| $\epsilon 3/\epsilon 4$                             | 5 (22.7%)   |
| $\epsilon 4/\epsilon 4$                             | 5 (22.7%)   |
| <b>Age, median (min, max)</b>                       | 66 (52, 81) |
| <b>Gender, N (%)</b>                                |             |
| female                                              | 12 (54.5%)  |
| male                                                | 10 (45.5%)  |
| <b>Education, y, median (min, max)</b>              | 17 (12, 20) |
| <b>Ethnicity, N (%)</b>                             |             |
| not Hispanic or Latinos                             | 18 (81.8%)  |
| Hispanic or Latinos                                 | 4 (18.2%)   |
| <b>MoCA, median (min, max)</b> <b>(missing = 6)</b> | 25 (20, 30) |
| <b>CDR, N (%)</b> <b>(missing = 1)</b>              |             |
| 0                                                   | 16 (72.7%)  |
| 0.5                                                 | 5 (22.7%)   |

**Supplementary Table 2.** ApoE Assay reproducibility. Plasma samples from two individuals ( $\epsilon 3/\epsilon 4$  and  $\epsilon 4/\epsilon 4$ ) were analyzed three times (intra-assay CVs) on three different days (inter-assay CVs).

|                                         |                     | Intra-assay CVs |       |       |        | Inter-assay CVs |       |
|-----------------------------------------|---------------------|-----------------|-------|-------|--------|-----------------|-------|
| Sample 1<br>( $\epsilon 3/\epsilon 4$ ) | E4/E3 Ratio         |                 | Day 1 | Day 2 | Day 3  |                 |       |
|                                         |                     | STDEV           | 0.031 | 0.015 | 0.050  | STDEV           | 0.090 |
|                                         |                     | MEAN            | 1.38  | 1.41  | 1.56   | MEAN            | 1.45  |
|                                         |                     | CV (%)          | 2.25  | 1.06  | 3.21   | CV (%)          | 6.21  |
|                                         | Glycosylation Level |                 | Day 1 | Day 2 | Day 3  |                 |       |
|                                         |                     | STDEV           | 0.015 | 0.011 | 0.012  | STDEV           | 0.013 |
|                                         |                     | MEAN            | 0.121 | 0.132 | 0.135  | MEAN            | 0.130 |
| CV (%)                                  |                     | 12.4            | 8.33  | 8.89  | CV (%) | 10.0            |       |
| Sample 2<br>( $\epsilon 4/\epsilon 4$ ) | Glycosylation Level |                 | Day 1 | Day 2 | Day 3  |                 |       |
|                                         |                     | STDEV           | 0.008 | 0.002 | 0.003  | STDEV           | 0.008 |
|                                         |                     | MEAN            | 0.134 | 0.125 | 0.118  | MEAN            | 0.126 |
|                                         |                     | CV (%)          | 5.97  | 1.60  | 2.54   | CV (%)          | 6.35  |

**Supplementary Figure 1.** Mass spectra resulting from the analysis of matched plasma and CSF from (a,b) heterozygous  $\epsilon 2/\epsilon 3$ , and (c,d) heterozygous  $\epsilon 2/\epsilon 4$  individual. Matrix adduct peaks are labeled with \*. For the glycan peak labeling, structure, and predicted masses, see Table 1.

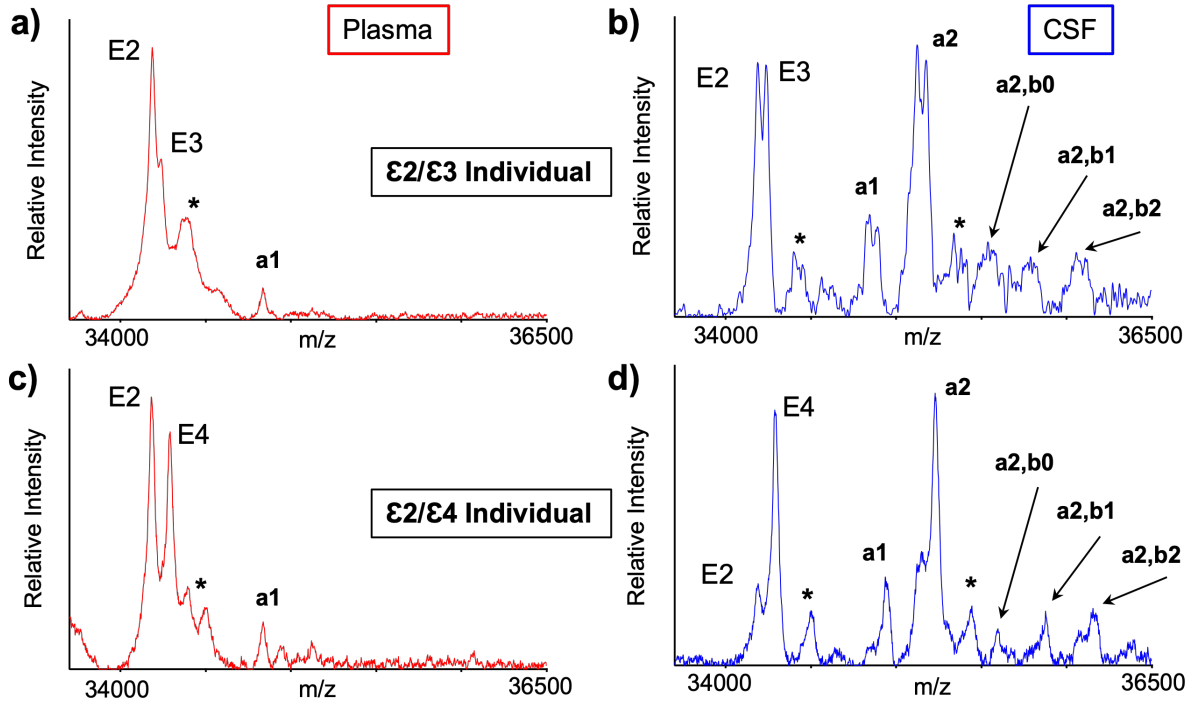

Supplement: jad-76-jad200203-s001.pdf [file jad-76-jad200203-s001.pdf]
